# Supplementary material for: A parabrachial to hypothalamic pathway mediates defensive behavior
Source: eLife. 2023 Mar 17;12:e85450. doi: 10.7554/eLife.85450 (PMC10023160; doi:10.7554/eLife.85450)
Supplement: Figure 1—figure supplement 1—source data 1. [file elife-85450-fig1-figsupp1-data1.xlsx]

## Sheet: Figure 1-supplyment 1C
Figure 1-supplyment 1C Quantification of CCK-tdT cells across the rostral-to-caudal extent of the LPB
Bregma	Number
-4.9	100	111	117
-5.02	122	119	131
-5.2	51	65	63
-5.34	24	27	24

## Sheet: Figure 1-supplyment 1G
Figure 1-supplyment 1G Percentage of CCK-positive neurons that co-localized with markers
Maker	Percentage of CCK-positive neurons that co-localized with markers
Vglut2	0.8507	0.8415	0.8532	0.8167
VGAT	0.0286	0.0083	0.0325	0.0091
CGRP	0.025	0.0247	0.0221	0.0171
