# Supplementary material for: A parabrachial to hypothalamic pathway mediates defensive behavior
Source: eLife. 2023 Mar 17;12:e85450. doi: 10.7554/eLife.85450 (PMC10023160; doi:10.7554/eLife.85450)
Supplement: Figure 1—source data 1. [file elife-85450-fig1-data1.xlsx]

## Sheet: Figure 1D
Figure 1D Number of labeled cells
animal 1							animal 2							animal 3							total average
region	slice 1	slice 2	slice 3	total	percentage	average	region	slice 1	slice 2	slice 3	total	percentage	average	region	slice 1	slice 2	slice 3	total	percentage	average
CC	94	103	95	292	0.257496	97.3333	CC	82	93	75	250	0.21815	83.3333	CC	80	95	76	251	0.242512	83.6667	88
DI	11	34	21	66	0.0582011	22	DI	18	23	17	58	0.0506108	19.3333	DI	27	32	28	87	0.084058	29	23
LPB	71	103	69	243	0.214286	81	LPB	94	102	91	287	0.250436	95.6667	LPB	67	82	63	212	0.204831	70.6667	83
PAG	26	34	19	79	0.0696649	26.3333	PAG	11	23	15	49	0.0427574	16.3333	PAG	12	19	16	47	0.0454106	15.6667	19
MO	137	175	142	454	0.400353	151.333	MO	166	172	164	502	0.438045	167.333	MO	139	157	142	438	0.423188	146	155

## Sheet: Figure 1N
Figure 1N Quantification of excitatory postsynaptic currents (EPSCs) from identified PVN neurons receiving inputs from the LPBCCK neurons in the presence of ACSF (Ctrl), TTX (1 μM) and 4-AP (100 μM)
	ACSF	TTX	4-AP
EPSCs（pA）	75.1	3.2	83.4
	52.6	2.8	78.7
	101.7	2.6	83.6
	137.4	1.9	147.1
	117	3.7	142.3
	83.4	2.2	91.3

## Sheet: Figure1P
Figure 1P Quantification of EPSCs and inhibitory postsynaptic currents (IPSCs) from identified PVN neurons receiving inputs from the LPBCCK neurons
	Before	CNQX/APV
EPSCs（pA）	80.8	2.8
	123.7	5.6
	157.4	3.1
	63.8	2.7
	72.7	3.9
	52.7	1.9
IPSCs（pA）	2.4	2.8
	2.8	2.6
	2.5	2.1
	1.9	2.6
	2.3	1.8
	2.1	1.9
