# Supplementary material for: A parabrachial to hypothalamic pathway mediates defensive behavior
Source: eLife. 2023 Mar 17;12:e85450. doi: 10.7554/eLife.85450 (PMC10023160; doi:10.7554/eLife.85450)
Supplement: Figure 2—figure supplement 1—source data 1. [file elife-85450-fig2-figsupp1-data1.xlsx]

## Sheet: Figure 2-supplyment 1D-F
Total distance（m）					Center time（s）
animals	EYFP(pre)	ChR2(pre)	EYFP(post)	ChR2(post)	animals	EYFP(pre)	ChR2(pre)	EYFP(post)	ChR2(post)
1#	12.531	20.158	14.566	9.763	1#	8.4	7	8.1	4.4
2#	10.132	16.808	13.055	17.637	2#	13.8	9.8	10.2	2.5
3#	16.644	9.417	11.857	8.191	3#	10.3	7.9	9.2	2
4#	29.573	17.559	20.764	8.296	4#	16.2	16.7	19	2.2
5#	19.095	11.68	22.542	10.051	5#	16.6	10	12.5	5.2
6#	11.472	11.124	10.37	6.83	6#	6.5	22.9	8.9	1.6
7#	26.105	12.508	20.097	9.591	7#	7.9	25	7.8	0.2
Center entries
animals	EYFP(pre)	ChR2(pre)	EYFP(post)	ChR2(post)
1#	6	11	6	5
2#	10	11	7	4
3#	8	7	8	2
4#	14	8	14	3
5#	15	7	14	4
6#	9	8	7	2
7#	12	8	13	1

## Sheet: Figure 2-supplyment 1I-J
Open arm time（s）						Open arm entries
animals	EYFP(pre)	ChR2(pre)	EYFP(post)	ChR2(post)		animals	EYFP(pre)	ChR2(pre)	EYFP(post)	ChR2(post)
1#	15.7	36	29.4	32.4		1#	13	11	8	9
2#	23.1	48.6	37.2	3.5		2#	8	11	9	1
3#	27.7	65.6	41.3	5.6		3#	9	14	8	2
4#	39.9	39.7	42.2	13.3		4#	6	12	10	2
5#	49.3	39.6	21.2	9.6		5#	8	8	7	5
6#	47.6	56.3	44.6	8.8		6#	9	11	6	4
7#	47.7	14.3	38.5	6.1		7#	8	8	8	4
