# Supplementary material for: A parabrachial to hypothalamic pathway mediates defensive behavior
Source: eLife. 2023 Mar 17;12:e85450. doi: 10.7554/eLife.85450 (PMC10023160; doi:10.7554/eLife.85450)
Supplement: Figure 2—source data 1. [file elife-85450-fig2-data1.xlsx]

## Sheet: Figure 2I
	Figure 2I Latency of EYFP group and ChR2 group
	EYFP							ChR2
animals	1#	2#	3#	4#	5#	6#	7#	1#	2#	3#	4#	5#	6#	7#
latency (s)	150	150	24	48	34	58	150	5	6	6	9	9	7	11

## Sheet: Figure 2J
	Figure 2J Speed of EYFP group and ChR2 group
	EYFP							ChR2
animals	1#	2#	3#	4#	5#	6#	7#	1#	2#	3#	4#	5#	6#	7#
Time in the nest (%)	0	0	3.33	10	8.34	26.67	0	100	100	100	100	100	100	80.84

## Sheet: Figure 2K
	Figure 2K Hiding time spent in the nest of EYFP group and ChR2 group
	EYFP							ChR2
animals	1#	2#	3#	4#	5#	6#	7#	1#	2#	3#	4#	5#	6#	7#
Speed (%)	185.86	82.63	182.34	96.33	173.52	272.57	297.5	368.7	486.03	377.32	430.21	288.24	344.69	237.03

## Sheet: Figure 2G
Figure 2G Quantification of the time of mice spent in the laser-paired chamber											Figure 2G Quantification of the time of mice spent in the laser-paired chamber
	Light off					Light on						Light off					Light on
EYFP	466	308	301.7	310.7	345	422.9	379.3	207.8	272.2	339.2	EYFP	466	308	301.7	310.7	345	422.9	379.3	207.8	272.2	339.2
ChR2	320.3	364.3	360.3	341.6	354	282.9	80.2	75.3	101.5	90.5	ChR2	320.3	364.3	360.3	341.6	354	282.9	80.2	75.3	101.5	90.5

## Sheet: Figure 2L
Figure2L Relative heart rate changes
animals	EYFP	ChR2
1#	0.983975	1.10081
2#	0.953378	1.18784
3#	0.955789	1.11884
4#	0.986389	1.02278
5#	1.03394	1.0858
6#	1.00724	1.08097
7#	0.990916	1.04698

## Sheet: Figure 2N
Figure 2N Relative pupil size (during photostimulation/before photostimulation) of LPBCCK neurons
animals	Before photostimulation	During photostimulation
1#	0.993195	1.4408
2#	0.976664	1.4116
3#	0.994121	1.69423
4#	0.997903	1.56319
5#	0.988753	1.85112
6#	0.878517	1.33578

## Sheet: Figure 2O
Figure 2O CORT concentration（ng/ml）
animals	EYFP	ChR2
1#	140.706	255.681
2#	91.8031	245.317
3#	97.1393	142.536
4#	123.184	364.258
5#	195.614	308.39
