# Supplementary material for: A parabrachial to hypothalamic pathway mediates defensive behavior
Source: eLife. 2023 Mar 17;12:e85450. doi: 10.7554/eLife.85450 (PMC10023160; doi:10.7554/eLife.85450)
Supplement: Figure 3—source data 1. [file elife-85450-fig3-data1.xlsx]

## Sheet: Figure 3Q
Figure 3Q Plot depicting the difference of positive df/F amplitude
rat	peak △F/F	looming	peak △F/F	TMT	peak △F/F
1#	13.144	1#	8.8512	1#	11.4916
2#	3.9376	2#	5.6458	2#	5.8806
3#	4.538	3#	4.717	3#	4.4236
4#	5.7322	4#	4.636	4#	7.6382
5#	8.133	5#	6.8136	5#	6.2193
average	7.09696	average	6.13272	average	7.13066

## Sheet: Figure3R
Figure 3R AUC for Ca2+ activity in response to threat stimuli.
rat	△AUC	looming	△AUC	TMT	△AUC
1#	435.356	1#	909.248	1#	873.494
2#	284.675	2#	713.21	2#	905.048
3#	222.911	3#	683.867	3#	155.722
4#	238.312	4#	571.246	4#	629.617
5#	222.911	5#	387.271	5#	350.66
average	280.833	average	652.968	average	582.908
