# Supplementary material for: A parabrachial to hypothalamic pathway mediates defensive behavior
Source: eLife. 2023 Mar 17;12:e85450. doi: 10.7554/eLife.85450 (PMC10023160; doi:10.7554/eLife.85450)
Supplement: Figure 4—source data 1. [file elife-85450-fig4-data1.xlsx]

## Sheet: Figure 4F
Figure 4F Latency（s）
animals	EYFP	GtACR1
1#	10	19
2#	16	12
3#	6	26
4#	5	11
5#	9	62
6#	9	30
7#	5	30
8#	4
9#	36
10#	2
11#	10

## Sheet: Figure 4G
Figure 4F Time in the nest（%）
animals	EYFP	GtACR1
1#	100	16.67
2#	25	5
3#	100	100
4#	100	100
5#	100	5.84
6#	100	6.67
7#	100	40
8#	100
9#	14
10#	100
11#	100

## Sheet: Figure 4H
Figure 4H Number of entries towards the rat
animals	EYFP	GtACR1
1#	14	14
2#	5	6
3#	5	12
4#	4	13
5#	5	22
6#	4	22
7#		14
8#		7
9#		4

## Sheet: Figure 4K
Figure 4K Time spent in the danger zone（%）
animals	EYFP	GtACR1
1#	18.35	11.82
2#	4.48	31.55
3#	8.417	10.4
4#	3.98	14.53
5#	3.78	34.82
6#	4.47	35.35
7#		11.2
8#		30.77
9#		58.7

## Sheet: Figure 4L
Figure 4L Travel distance （m）
animals	EYFP	GtACR1
1#	18.11	8.514
2#	5.62	10.028
3#	6.99	15.516
4#	7.63	13.115
5#	5.53	17.57
6#	9.14	17.73
7#		15.896
8#		9.896
9#		5.946
