# Supplementary material for: A parabrachial to hypothalamic pathway mediates defensive behavior
Source: eLife. 2023 Mar 17;12:e85450. doi: 10.7554/eLife.85450 (PMC10023160; doi:10.7554/eLife.85450)
Supplement: Figure 5—source data 1. [file elife-85450-fig5-data1.xlsx]

## Sheet: Figure 5F
Figure 5F Latency of EYFP group and ChR2 group
	EYFP							ChR2
animals	1#	2#	3#	4#	5#	6#	7#	1#	2#	3#	4#	5#	6#	7#
latency (s)	37	58	150	35	11	73	150	10	7	4	6	12	10	7

## Sheet: Figure 5G
Figure 5G Time in the nest of EYFP group and ChR2 group
	EYFP							ChR2
animals	1#	2#	3#	4#	5#	6#	7#	1#	2#	3#	4#	5#	6#	7#
Time in the nest (%)	4.17	4.17	0	2.5	6.67	8.75	0	100	100	100	100	100	100	25

## Sheet: Figure 5H
Figure 5H Speed of EYFP group and ChR2 group
	EYFP							ChR2
animals	1#	2#	3#	4#	5#	6#	7#	1#	2#	3#	4#	5#	6#	7#
Speed (%)	73.02	44.46	147.11	148.52	163	115	165	451.25	283.09	213.07	198.22	216.82	273.82	308.83

## Sheet: Figure 5I
Figure 5I Cfos number(100 per mm2)
animals	EYFP	ChR2
1#	1.15831	10.208
2#	2.08605	10.918
3#	1.97559	7.05166

## Sheet: Figure 5K
Figure 5J Relative heart rate changes induced by photostimulation
animals	EYFP	ChR2
1#	1.02726	1.15585
2#	1.03887	1.10068
3#	1.00649	1.16433
4#	0.965255	1.04089
5#	0.970634	1.06735
6#	0.970281	1.07426
7#	0.981655	1.13136

## Sheet: Figure 5L
Figure 5N CORT concentration（ng/ml）
animals	EYFP	ChR2
1#	107.086	148.895
2#	96.5925	187.309
3#	67.4278	218.75
4#	56.3119	332.087
5#	103.134	320.897

## Sheet: Figure 5M
Figure 5M Relative pupil size of animals
animals	Laseer On/ Laser Off
1#	1.01901
2#	1.02205
3#	0.993468
4#	1.0311
5#	1.00617
6#	0.998658

## Sheet: Figure 5J
Figure 5J.Quantification of c-fos positive cells in the PVN（100 per mm2）
	EYFP	ChR2
	1.15831	10.208
	2.08605	10.918
	1.97559	7.05166
