# Supplementary material for: A parabrachial to hypothalamic pathway mediates defensive behavior
Source: eLife. 2023 Mar 17;12:e85450. doi: 10.7554/eLife.85450 (PMC10023160; doi:10.7554/eLife.85450)
Supplement: Figure 6—figure supplement 1—source data 1. [file elife-85450-fig6-figsupp1-data1.xlsx]

## Sheet: Supplymet 1D
Supplyment 1D.Quantification for the percentage of activated CRH neurons in the PVN following blue light activation
	EYFP	ChR2
	20.5567	70.3733
	21.0967	66.12
	21.88	45.7

## Sheet: Supplyment 1I
Supplymet 5I Latency（s）
animals	EYFP	ChR2
1#	13	53
2#	36	150
3#	150	150
4#	150	45
5#	50	112
6#	89	31
7#	51

## Sheet: Supplymemt 1J
Supplyment 1J Speed（%）
animals	EYFP	ChR2
1#	171.43	519.05
2#	55.17	150
3#	149.95	180
4#	150	112.5
5#	205.26	144.44
6#	126.47	196.88
7#	126

## Sheet: Supplymet 1K
Supplyment 1K Time in the nest（%）
animals	EYFP	ChR2
1#	100	5.83
2#	33.33	100
3#	0	100
4#	0	3.33
5#	5.83	0
6#	1.67	2.5
7#	5.83
					SU
