# Supplementary material for: A parabrachial to hypothalamic pathway mediates defensive behavior
Source: eLife. 2023 Mar 17;12:e85450. doi: 10.7554/eLife.85450 (PMC10023160; doi:10.7554/eLife.85450)
Supplement: Figure 6—source data 1. [file elife-85450-fig6-data1.xlsx]

## Sheet: Figure6C
Figure 6C Latency（s）
	Saline							CNO
animals	1#	2#	3#	4#	5#	6#	7#	1#	2#	3#	4#	5#	6#	7#
latency (s)	14	4	9	7	11	3	10	13	33	17	65	34	15	18

## Sheet: Figure 6D
Figure 6D. Speed（%）
	Saline							CNO
animals	1#	2#	3#	4#	5#	6#	7#	1#	2#	3#	4#	5#	6#	7#
Time in the nest (%)	100	100	100	74.1667	100	76.6667	20	10	84.1667	9.16667	13.3333	6.66667	25	30.8333

## Sheet: Figure 6E
Figure 6E.Time in the nest（%）
	Saline							CNO
animals	1#	2#	3#	4#	5#	6#	7#	1#	2#	3#	4#	5#	6#	7#
Speed (%)	240.13	254.408	287.919	299.918	252.247	257.438	432.74	151.869	127.921	178.258	62.141	92.2198	52.4476	116.906

## Sheet: Figure 6I
Figure 6I. Latency（s）
	ACSF						CNQX+AP5						Devazepide + L-365260
animals	1#	2#	3#	4#	5#	6#	1#	2#	3#	4#	5#	6#	1#	2#	3#	4#	5#
latency (s)	11	7	6	9	3	5	10	13	18	15	21	10	7	5	6	14	6

## Sheet: Figure 6J
Figure 6J. Speed（%）
	ACSF						CNQX+AP5						Devazepide + L-365260
animals	1#	2#	3#	4#	5#	6#	1#	2#	3#	4#	5#	6#	1#	2#	3#	4#	5#
Time in the nest (%)	64.1667	23.3333	100	100	84.1667	100	4.16667	30	1.66667	44.1667	14.1667	37.5	100	100	100	100	70

## Sheet: Figure 6K
Figure 6K.Time in the nest（%）
	ACSF						CNQX+AP5						Devazepide + L-365260
animals	1#	2#	3#	4#	5#	6#	1#	2#	3#	4#	5#	6#	1#	2#	3#	4#	5#
Speed (%)	210.959	328.076	242.802	245.205	222.414	160.144	137.43	156.835	168.41	169.412	167.683	87.6275	288.715	275.375	373.214	282.283	213.187

## Sheet: Figure 6N
Figure 6N Latency（s）
animals	EYFP	ChR2
1#	120	5
2#	15	6
3#	120	23
4#	120	19
5#	120	14
6#	120	10

## Sheet: Figure 6O
Figure 6O Speed（%）
animals	EYFP	ChR2
1#	88.16	359.62
2#	265.85	244.01
3#	44.3	187.62
4#	160.96	770.7
5#	184.05	391.43
6#	111.11	353.29

## Sheet: Figure 6P
Figure 6P Time in the nest（%）
animals	EYFP	ChR2
1#	0	100
2#	1.67	28.33
3#	0	100
4#	0	100
5#	0	27.5
6#	0	10.83
